# Supplementary material for: Aqueous synthesis of dual-targeting Gd-doped CuInS2/ZnS quantum dots for cancer-specific bi-modal imaging
Source: Royal Society of Chemistry journal article supplement (doi:10.1039/c7nj02252b), 2017-01-01
Supplement: c7nj02252b1.pdf [file c7nj02252b1.pdf]

## Supporting Information

# Aqueous synthesis of dual-targeting Gd-doped CuInS<sub>2</sub>/ZnS quantum dots for cancer-specific bi-modal imaging

Gangaraju Gedda,<sup>a‡</sup> Guan-Rong Chen,<sup>a‡</sup> Yueh-Yun Yao,<sup>b</sup> Wubshet Mekonnen  
Girma,<sup>a</sup> Jyun-Dong Li,<sup>a</sup> Chia-Liang Yen,<sup>b</sup> Yong-Chien Ling,<sup>b</sup> Jia-Yaw Chang<sup>a\*</sup>

- a. Department of Chemical Engineering, National Taiwan University of Science and Technology, Taipei, 10607, Taiwan, Republic of China
- b. Department of Chemistry, National Tsing Hua University, Hsinchu, 30013, Taiwan, Republic of China

‡ Gangaraju Gedda and Guan-Rong Chen contributed equally to this work.

\*Corresponding author: Jia-Yaw Chang

Department of Chemical Engineering, National Taiwan University of Science and Technology, 43, Section 4, Keelung Road, Taipei, 10607, Taiwan, Republic of China

E-mail: [jychang@mail.ntust.edu.tw](mailto:jychang@mail.ntust.edu.tw)

Tel.: +886-2-27303636.

Fax: +886-2-27376644.

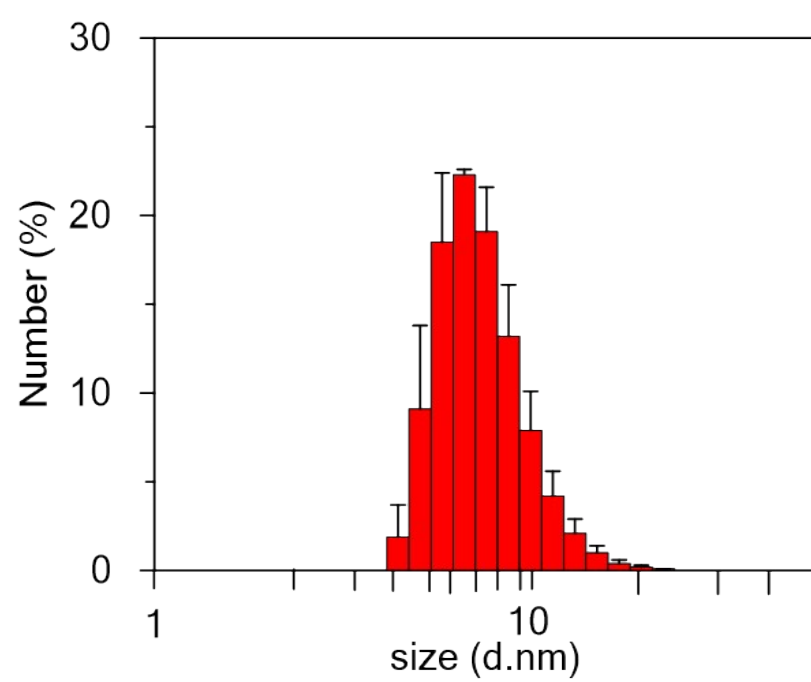

**Figure S1.** DLS histogram of the CIGS/ZnS *q*-dots

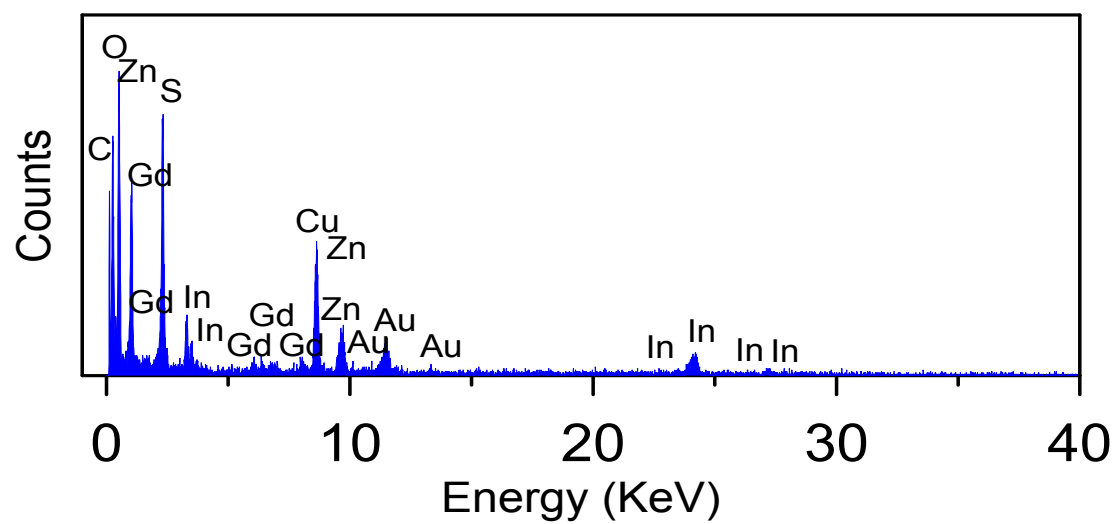

**Figure S2.** The EDS spectra of CIGS/ZnS *q*-dots

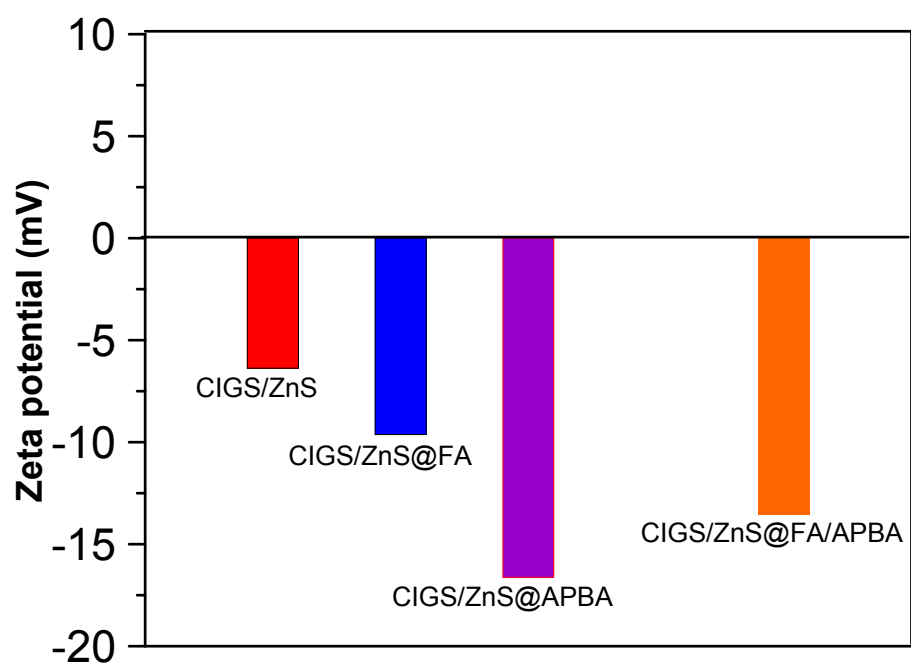

**Figure S3.** Zeta potential of CIGS/ZnS *q*-dots

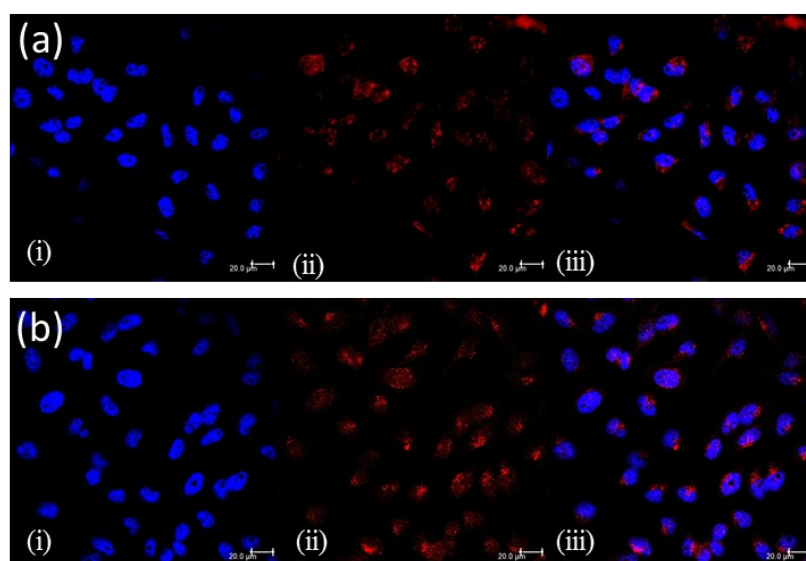

**Figure S4.** CLSM image of HeLa cells pre-treated with (a) CIGS/ZnS@APBA *q*-dots; and (b) CIGS/ZnS@APBA *q*-dots, respectively. (i) Blue fluorescence channel represents the location of the nucleus; (ii) Red fluorescence channel represents the location of the *q*-dots; (iii) Overlap images of fluorescence channel and bright field. The scale bars correspond to 0.2  $\mu\text{m}$ .

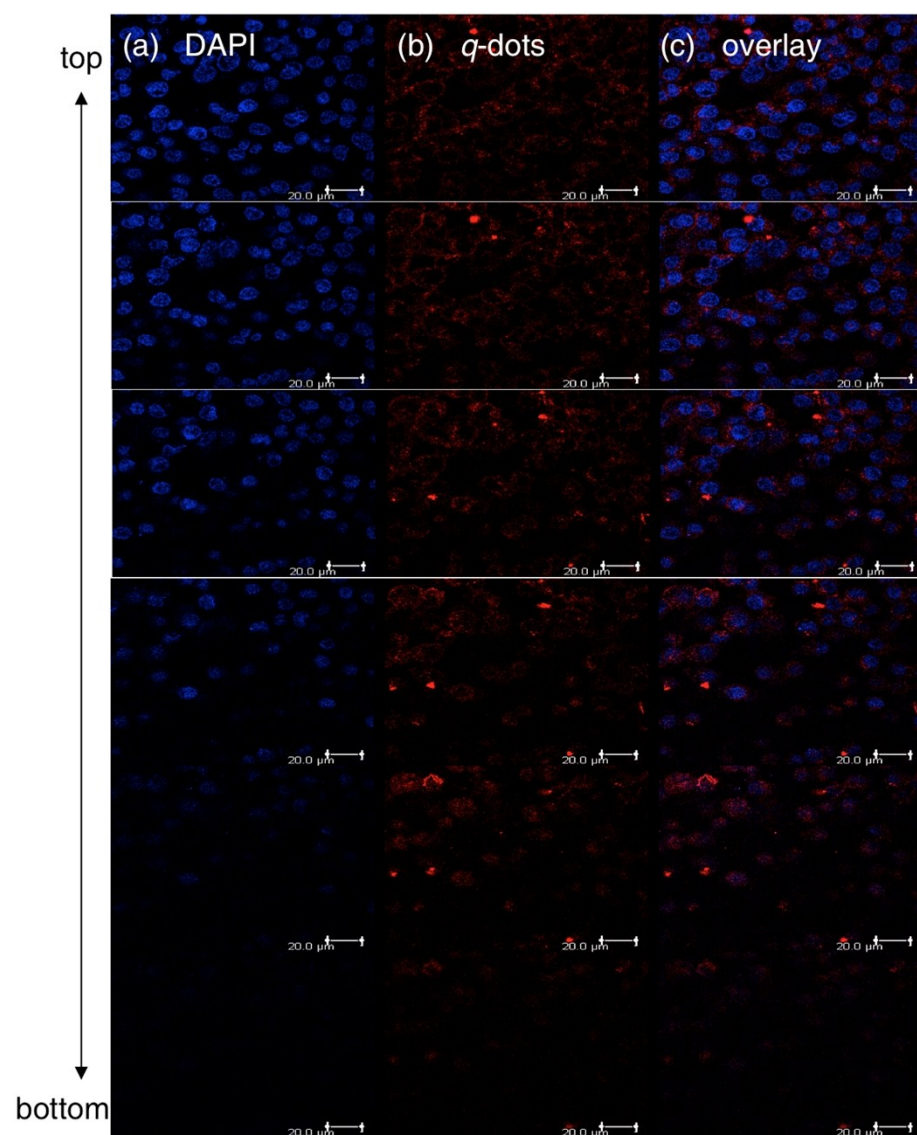

**Figure S5.** CLSM Z-stack images of CIGS/ZnS@FA|APBA *q*-dots internalized by HeLa cells. The images were taken every 0.2 μm by scanning the samples across a defined section along the z-axis.

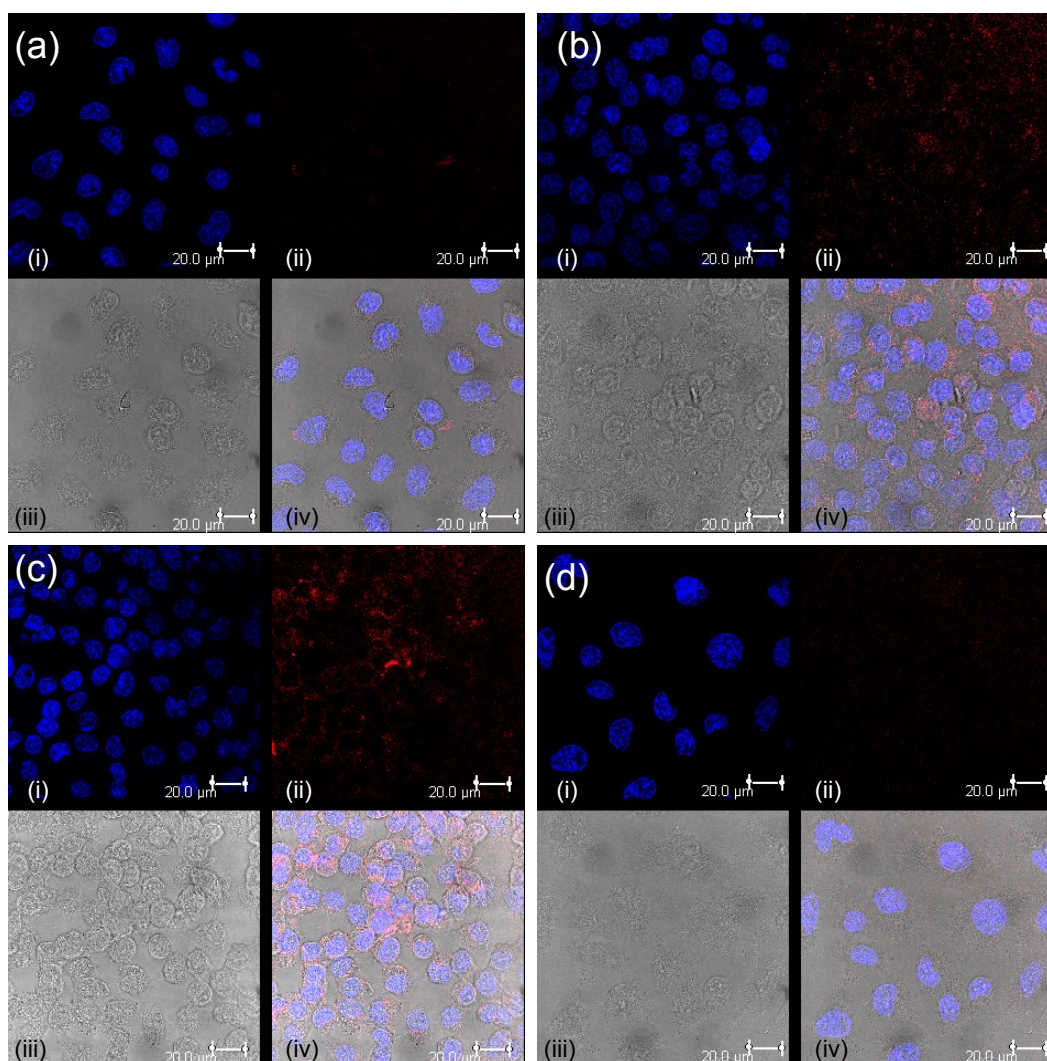

**Figure S6.** CLSM images of HeLa cells pre-treated with (a) sialidase and folic acid, (b) folic acid, and (c) sialidase, respectively, before incubating with CIGS/ZnS@FA|APBA *q*-dots. (d) CLSM images of HeLa cells incubated with CIGS/ZnS *q*-dots for 2 h, fixed and treated with a nuclear staining agent, DAPI. (i) Blue fluorescence channel represents the location of the nucleus; (ii) Red fluorescence channel represents the location of the *q*-dots; (iii) Bright-field represents the cell morphologies; (iv) Overlap images of fluorescence channel and bright field. The scale bars correspond to 20.0  $\mu\text{m}$ .

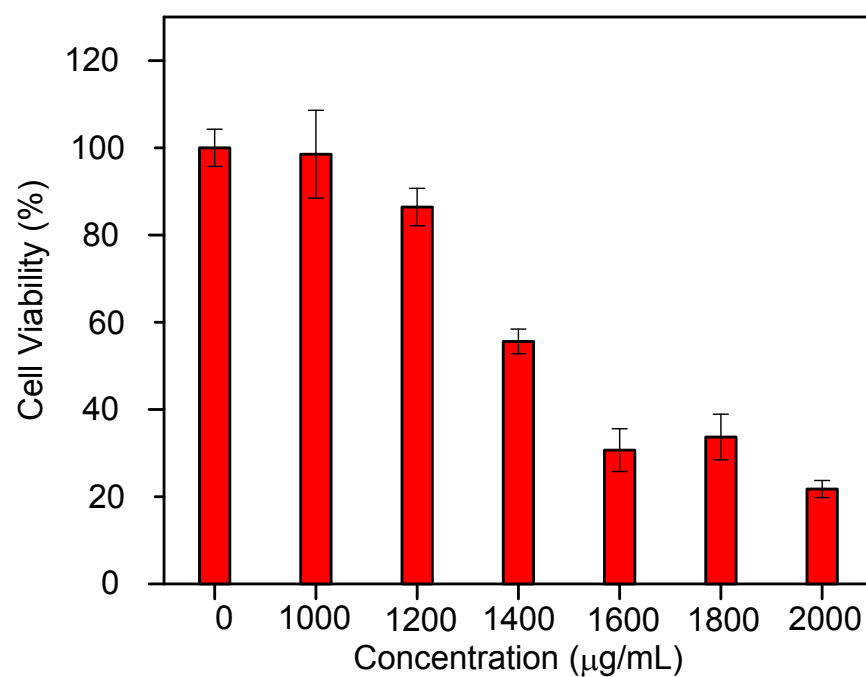

**Figure S7.** The cell viability of the CIGS/ZnS@FA/APBA *q*-dots against the HeLa cells from a MTT assay after 24 h incubation. The data presented percentage cell viability (means%  $\pm$  SD,  $n = 3$ ), which was calculated relative to that of untreated cells (with arbitrarily assigned 100% viability).



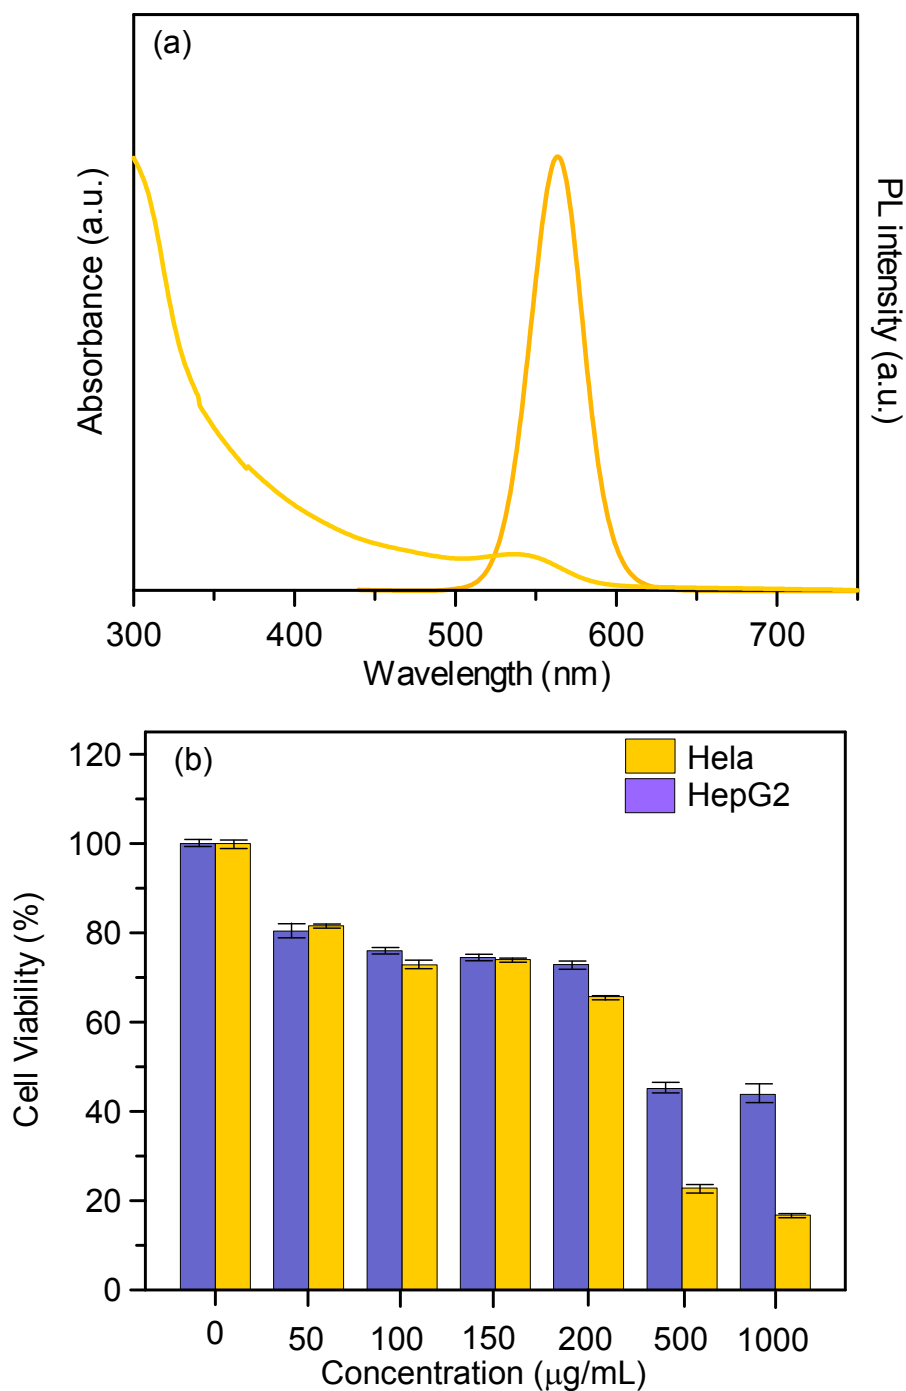

**Figure S8.** (a) The absorption and PL spectra of GSH-coated CdTe QDs prepared at 100 °C for 65 min. (b) The cell viability of the GSH-coated CdTe QDs against the HeLa and HepG2 cells from a MTT assay after 24 h incubation. The data presented percentage cell viability (means%  $\pm$  SD,  $n = 3$ ), which was calculated relative to that of untreated cells (with arbitrarily assigned 100% viability)

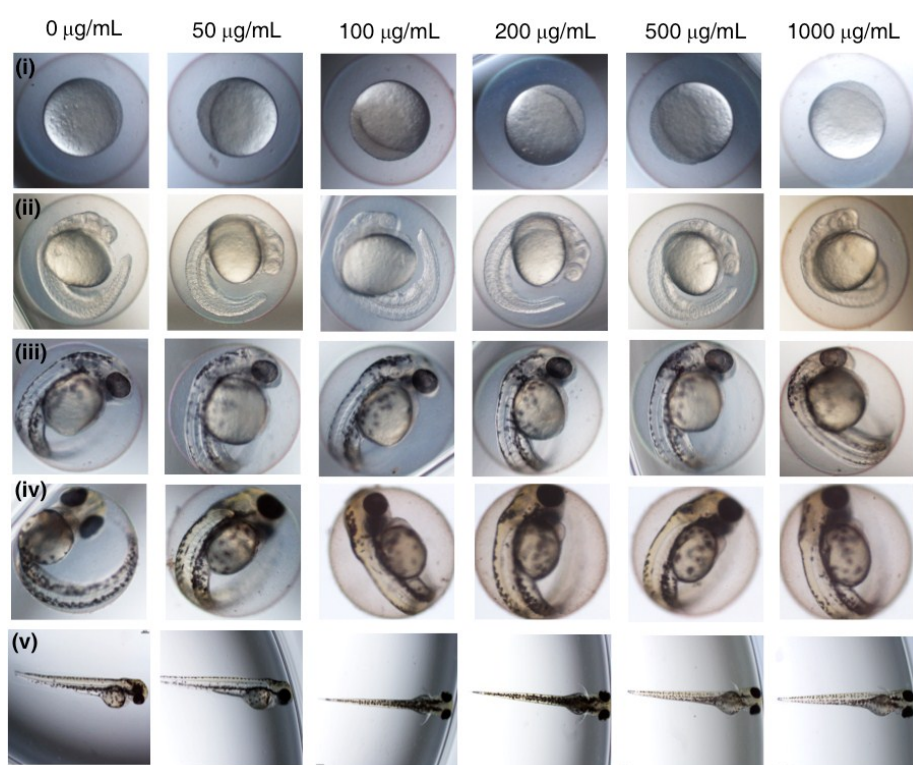

**Figure S9.** Optical images of representative developmental stages of zebrafish embryos in water containing different concentration of CIGS/ZnS *q*-dots without the modification of dual targeting ligands: (i) 3 hpf, (ii) 24 hpf, (iii) 48 hpf, (iv) 72hpf, and (v) 96 hpf. hpf = hours post-fertilization.
